# Supplementary material
Source: PubMed Central journal article supplement (PMC4733248)
Supplement: NIHMS746734-supplement-7.pdf [file NIHMS746734-supplement-7.pdf]

## Supplemental Experimental Procedure

### *Drosophila* genotypes used for clonal analysis:

GFP<sup>-</sup> *hpo*<sup>-</sup> clones:  
*hs-Flp; FRT42D hpo*<sup>42-47</sup> / *FRT42D Ubi-GFP*

GFP<sup>-</sup> *wts*<sup>-</sup> clones:  
*hs-Flp; FRT82B wts*<sup>X1</sup> / *FRT82B Ubi-GFP*  
*hs-Flp; FRT82B wts*<sup>X1</sup> / *FRT82B Arm-lacZ*

GFP<sup>-</sup> *sav*<sup>-</sup> clones:  
*hs-Flp; FRT82B sav*<sup>3</sup> / *FRT82B Ubi-GFP*

GFP<sup>-</sup> *mats*<sup>-</sup> clones:  
*hs-Flp; FRT82B mats*<sup>e235</sup> / *FRT82B Ubi-GFP*

GFP<sup>-</sup> *yki*<sup>-</sup> clones:  
*hs-Flp; FRT42D yki*<sup>B5</sup> / *FRT42D Ubi-GFP*

GFP<sup>-</sup> *Cka*<sup>-</sup> clones:  
*hs-Flp; FRT40A Cka*<sup>s1883</sup> / *FRT40A Ubi-GFP*

GFP<sup>+</sup> clones overexpressing *yki*:  
*hs-Flp; actP>CD2>Gal4; UAS-GFP/UAS-yki*

GFP<sup>+</sup> *sd*<sup>-</sup> clones overexpressing *yki*:  
*tub-Gal80 hs-Flp FRT19A/sd*<sup>47M</sup> *FRT19A; UAS-GFP; tub-Gal4/UAS-yki*

### Molecular biology

Full-length cDNA clones for *cact* (LD10168), *Tl* (RE13664) and *Pil* (LD43152) were obtained from *Drosophila* Genomics Resource Center (DGRC). *Tl*<sup>10b</sup> was generated by mutating Cys781 of *Tl* into Tyr using QuickChange Lighting kit (Agilent). *Tl*<sup>10b</sup>-FLAG and FLAG-Cact were constructed by adding a FLAG tag (MDYKDDDDK) to the C-terminus and N-terminus respectively using the pAc5.1/V5-HisB vector (Invitrogen). HA-Pil was generated by adding an N-terminal HA tag (MYPYDVPDYA) using the same vector. FLAG-Cact was cloned into pUASTattB vector and used to generate UAS-Cact *Drosophila* line. V5-Wts, Myc-Hpo and Myc-Hpo<sup>KD</sup> (kinase dead) have been described previously (Huang et al., 2005; Wu et al., 2003). All plasmids were verified by DNA sequencing (Macrogen).

### Cell culture

Mbn2 cells were purchased from DGRC. S2 cells, S2R+ cells and Mbn2 cells were cultured in *Drosophila* Schneider's Medium (Gibco) supplemented with 10% FBS and antibiotics. Gene knockdown in cultured cells was performed following the bathing protocol provided by *Drosophila* RNAi Screening Center (DRSC). To make heat-inactivated bacteria, 4 ml of overnight cultured *S. Aureus* (OD<sub>600</sub>=2) or *E. Faecalis* (OD<sub>600</sub>=2) suspension was spun down (5000 g for 5 min). After re-suspending in 1 ml ddH<sub>2</sub>O, the bacteria were treated under 65°C for 1.5 hrs. For western blot in cultured cells, cells were seeded in 12 well culture plate and transfected with Effectene transfection reagent (Promega) after 24 hrs. 48 hrs later, cell lysate was prepared by boiling in standard SDS loading buffer for 10 min and analyzed by SDS-PAGE. Signals were detected using ECL Western Blotting Substrate, SuperSignal Dura Extended Duration Substrate or SuperSignal Femto Maximum Sensitivity Substrate (Pierce).

### Antibodies

Anti-Cact antibody 3H12 was described previously (Whalen and Steward, 1993) and was obtained from Developmental Studies Hybridoma Bank (DSHB). Phospho-antibody against the activation loop of MST1/MST2/Hpo (Hpo-Thr<sup>195</sup>) was obtained from Cell Signaling (#3681). Anti-Hpo antibody has been described (Wu et al., 2003). Phospho-Yki and Yki antibodies were described previously (Dong et al., 2007).

### **Immunostaining**

Third instar larvae were dissected in PBS and fixed with 4% paraformaldehyde for 30 min at 37°C (fat body staining) or 15 min at room temperature (wing disc staining). The tissues were then washed with PBST and blocked in 5% goat serum for 30 min. After incubating with 1:50-1:100 dilution of the primary antibody at room temperature for 2 hrs, the samples were washed for 3 times with PBST and followed by incubating with the corresponding secondary antibody at room temperature for 2 hrs. The samples were washed for 3 times and mount with VECTASHIELD mounting medium containing the nuclear dye DAPI.

### **RNA preparation and quantitative real-time PCR**

Sex-matched adults were infected with *S. Aureus* ( $OD_{600}=2$ ) or *Ecc15* ( $OD_{600}=200$ ) and kept at 29°C. After 6 hrs, live flies were collected and frozen in liquid nitrogen until usage. Flies were homogenized in liquid nitrogen to break the tissues. RNA was extracted using Trizol Reagent (Invitrogen) and purified using RNeasy Mini Kit (Qiagen) following the kit manual. For each sample, 1 µg RNA was used for reverse transcription using iScript cDNA synthesis kit (BioRad). 100 ng cDNA was used for real-time PCR with SYBR master mix (BioRad). Real-time PCR was performed using CFX96 real-time system (BioRad).

### **Luciferase assay**

Luciferase assay was performed as previously described (Wu et al., 2008). Briefly, *Drosophila* S2R+ cells were seeded on 48 well plate. After 24 hrs, cells were transfected with the desired luciferase reporter constructs together with Renilla luciferase reporter plasmid (as the internal control) using Effectene transfection reagent (Promega). Luciferase assay was performed at 24 hrs post transfection by using Dual Luciferase Assay system (Promega) following the manufacturer's instructions and a FLUOstar Lumimeter (BMG Lab Technologies).

### **In Vitro kinase assay**

For kinase assay with Hpo as substrate, S2 cells were transfected with FLAG-P11 and FLAG-Tao1 plasmids. 48 hrs post-transfection, cells were lysed with lysis buffer (50 mM Tris at PH 7.4, 150 mM NaCl, 1 mM EDTA, 0.5% Triton X-100, protease inhibitor cocktail (Roche), 50 mM NaF, 1.5 mM  $Na_3VO_4$ ) and immunoprecipitated with anti-FLAG agarose beads (Biolegend). The immunoprecipitated P11 and Tao1 were incubated with recombinant GST-Hpo<sup>KD</sup> in kinase buffer containing 25 mM HEPES PH 7.2, 25 mM  $MgCl_2$ , 50 mM β-glycerol phosphate, 2 mM dithiothreitol, 0.5 mM sodium vanadate, 10 µM ATP at 37°C for 30 min.

For kinase assay with Cka as substrate, S2R+ cells were transfected with HA-P11, lysed with lysis buffer (see above) and immunoprecipitated with anti-HA antibody (Sigma). *In vitro* kinase assay was performed as previously described (Allen et al., 2007). Briefly, the immunoprecipitated P11 was subjected to kinase assay in the presence of 1mM ATP-γ S, 10 mM HEPES PH 7.4, 150 mM NaCl, 10 mM  $MgCl_2$  and 1 µg GST-Cka. The reaction mixtures were incubated for 30 min at 30°C, which was further supplemented with 2.5 mM PNBM for 2 hrs at room temperature. The mixtures were boiled and analyzed by SDS-PAGE.

**Supplemental Table S1. Quantification of clonal phenotypes, related to Figure 2, 3, 4, 5, 6, 7, S2 and S4.**

| <b>Figure #</b> | <b>Phenotype</b>                                                   | <b>Positive/Total</b> |
|-----------------|--------------------------------------------------------------------|-----------------------|
| Figure 2A       | Reduced Drs-GFP in <i>wts</i> mutant cells                         | 13/21                 |
| Figure 2B       | Normal Dpt-GFP in <i>wts</i> mutant cells                          | 18/18                 |
| Figure 2C       | Increased Cact in <i>hpo</i> mutant cells                          | 27/33                 |
| Figure 2D       | Increased Cact in <i>sav</i> mutant cells                          | 23/28                 |
| Figure 2E       | Increased Cact in <i>wts</i> mutant cells                          | 32/34                 |
| Figure 2F       | Increased Cact in <i>mats</i> mutant cells                         | 25/26                 |
| Figure 3A       | Increased Cact in Yki-overexpression cells                         | 40/41                 |
| Figure 3B       | Reduced Cact in <i>yki</i> mutant cells                            | 7/10                  |
| Figure 3C       | Normal Cact in <i>sd</i> mutant Yki-overexpression cells           | 23/23                 |
| Figure 3D       | Increased cact-lacZ in Yki-overexpression cells                    | 39/53                 |
| Figure 3E       | Increased cact-lacZ in <i>wts</i> mutant clones                    | 20/23                 |
| Figure 4C       | Increased #4-lacZ in Yki-overexpression clones                     | 21/22                 |
| Figure 4D       | Normal #4M1-lacZ in Yki-overexpression clones                      | 20/20                 |
| Figure 4E       | Increased #4-lacZ in Yki-overexpression cells                      | 27/35                 |
| Figure 4F       | Normal #4M1-lacZ in Yki-overexpression cells                       | 45/45                 |
| Figure 5C       | Reduced cytoplasmic Yki in <i>hpo</i> mutant cells                 | 19/24                 |
| Figure 6F       | Reduced cytoplasmic Yki in <i>pll</i> mutant cells                 | 22/28                 |
| Figure 6G       | Normal Yki localization in Cact-overexpression cells               | 55/55                 |
| Figure 6H       | Increased Yki cytoplasmic localization in Tl-overexpression cells  | 38/51                 |
| Figure 6I       | Increased Yki cytoplasmic localization in Pll-overexpression cells | 43/46                 |
| Figure 7B       | Increased Yki cytoplasmic localization in <i>Cka</i> mutant cells  | 17/25                 |
| Figure 7H       | Reduced Cka in Pll-overexpression cells                            | 26/26                 |
| Figure 7I       | Reduced Cka in Pll-overexpression cells                            | 23/23                 |
| Figure 7K       | Increased Cka in Pll-knockdown cells                               | 29/35                 |
| Figure 7L       | Increased Cka in Pll-knockdown cells                               | 32/33                 |
| Figure S2A      | Increased Cact in <i>hpo</i> mutant clones                         | 18/22                 |
| Figure S2B      | Increased Cact in <i>sav</i> mutant clones                         | 21/24                 |
| Figure S2C      | Increased Cact in <i>wts</i> mutant clones                         | 47/48                 |
| Figure S2D      | Increased Cact in <i>mats</i> mutant clones                        | 50/53                 |
| Figure S4A      | Increased Cact in Yki-overexpression clones                        | 34/34                 |
| Figure S4B      | Increased Cact in Yki-overexpression cells                         | 29/29                 |
| Figure S4C      | Increased Cact in Yki-overexpression cells                         | 15/15                 |
| Figure S4D      | Normal Cact in <i>sd</i> mutant Yki-overexpression clones          | 27/27                 |

### **Supplemental References**

Whalen, A.M., and Steward, R. (1993). Dissociation of the dorsal-cactus complex and phosphorylation of the dorsal protein correlate with the nuclear localization of dorsal. *J Cell Biol* 123, 523-534.
