# Supplementary material
Source: PubMed Central journal article supplement (PMC4733248)

Figure S1

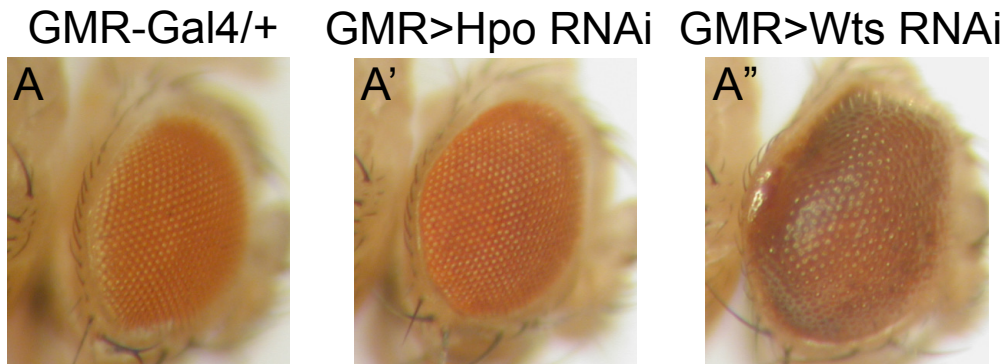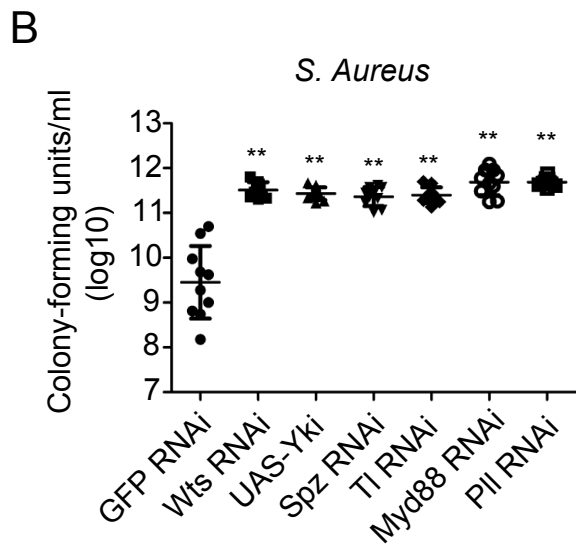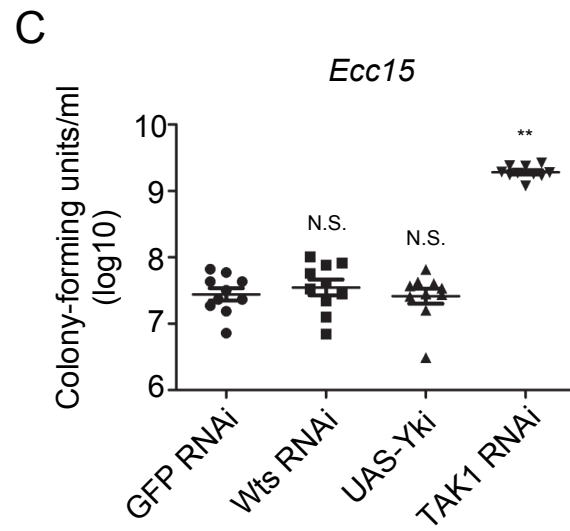

Supplement: NIHMS746734-supplement-1.pdf [file NIHMS746734-supplement-1.pdf]

Figure S2

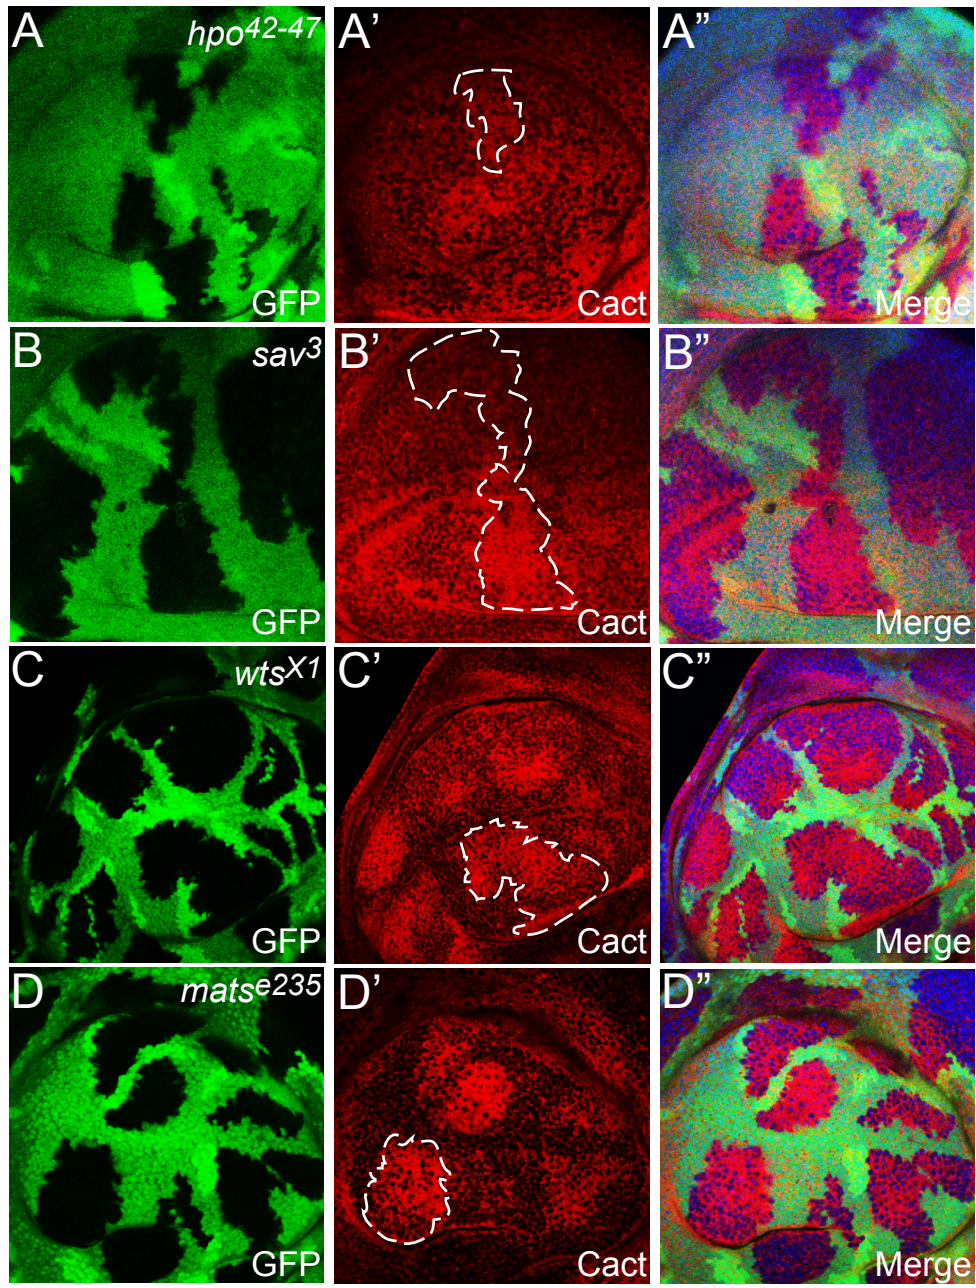

Supplement: NIHMS746734-supplement-2.pdf [file NIHMS746734-supplement-2.pdf]

Figure S3

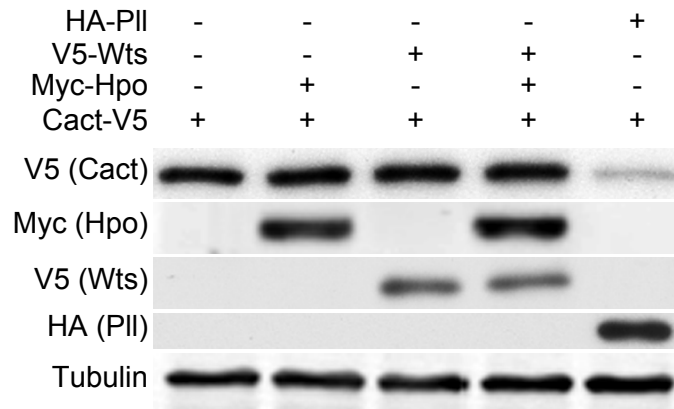

Supplement: NIHMS746734-supplement-3.pdf [file NIHMS746734-supplement-3.pdf]

Figure S4

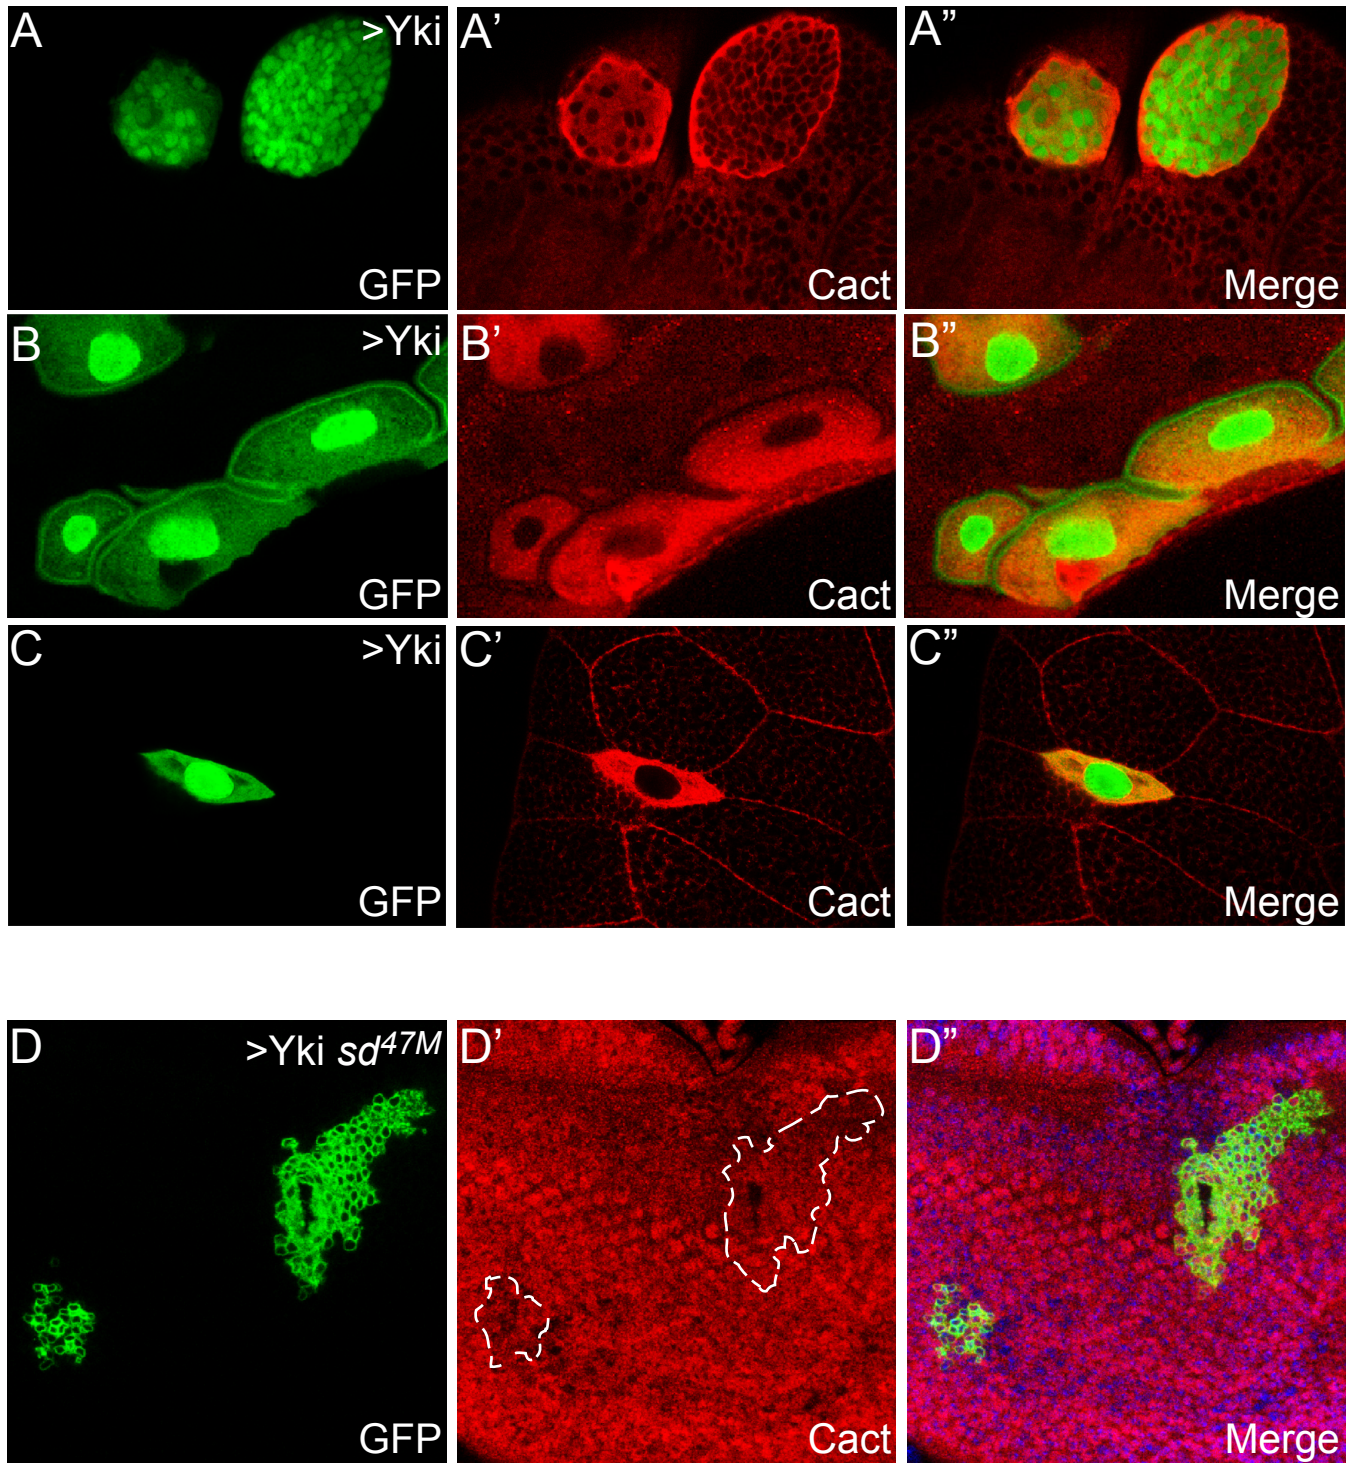

Supplement: NIHMS746734-supplement-4.pdf [file NIHMS746734-supplement-4.pdf]

Figure S5

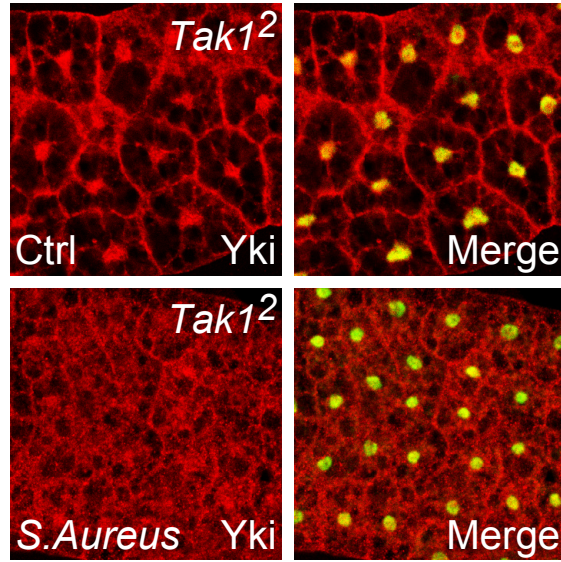

Supplement: NIHMS746734-supplement-5.pdf [file NIHMS746734-supplement-5.pdf]

# Figure S6

**A**

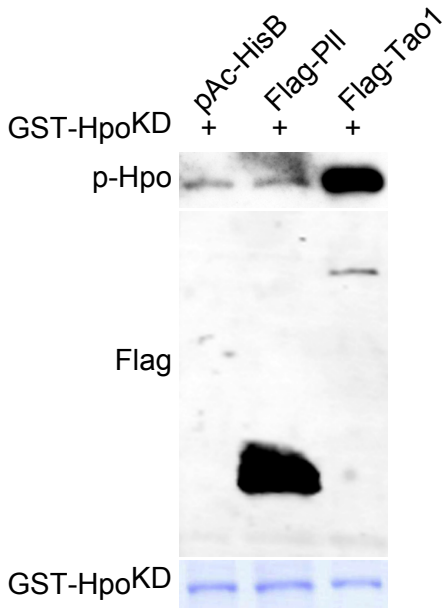

**B**

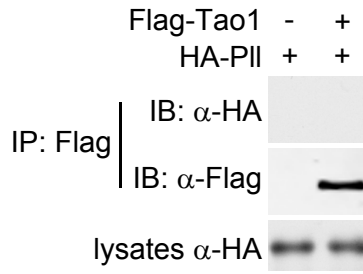

**C**

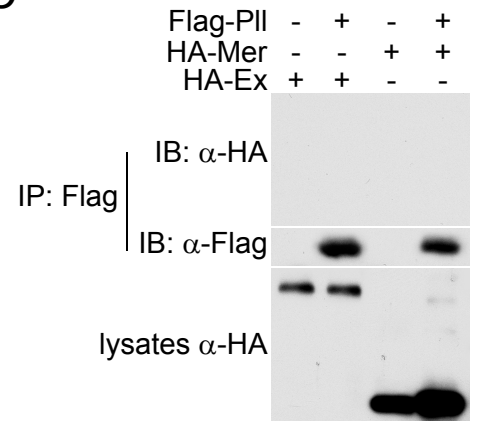

**D**

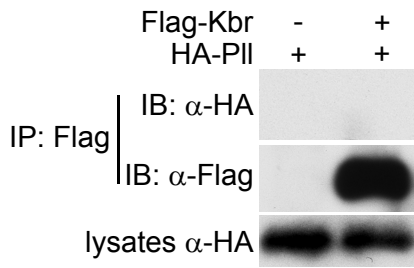

**E**

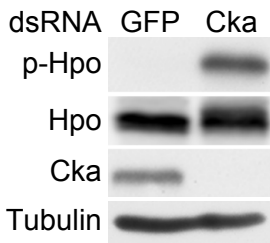

**F**

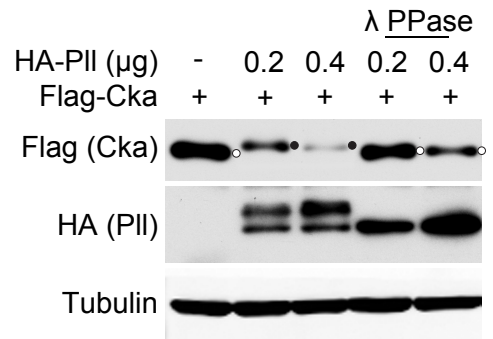

Supplement: NIHMS746734-supplement-6.pdf [file NIHMS746734-supplement-6.pdf]
